1 Effects of treatment with three antibiotics, vancomycin, neomycin, and AVNM on gut  
2 microbiome in C57BL/6 mice

3

4 Pratikshya Ray<sup>1</sup>, Subhayan Chakraborty<sup>2</sup>, Arindam Ghosh<sup>2</sup> and PalokAich<sup>1\*</sup>

5

6 <sup>1</sup>School of Biological Sciences, <sup>2</sup> School of Chemical Sciences

7 National Institute of Science Education and Research (NISER), HBNI, P.O. - Bhimpur-

8 Padanpur, Jatni - 752050 Dist. - Khurdha, Odisha, India

9

10 \*Correspondence:

11 Dr. PalokAich

12 [palok.aich@niser.ac.in](mailto:palok.aich@niser.ac.in)

13

14 Running Title: Three select antibiotics and gut microbiome

15

16

17

18

19

20

21

22 SRA accession: PRJNA649690, PRJNA566053, PRJNA655995

23

24 **Abstract**

25 Higher organisms, especially mammals, harbor diverse microbiota in the gut that plays a major  
26 role in maintaining health and physiological homeostasis. Perturbation of gut flora helps  
27 identifying their roles. Antibiotics are potent perturbing agents of microbiome. Select antibiotics  
28 like vancomycin, neomycin, and AVNM (an antibiotic cocktail containing ampicillin,  
29 vancomycin, neomycin, and metronidazole) were used to perturb the gut microbiota of C57BL/6  
30 male mice to understand their roles in host immunity and metabolism. The current study revealed  
31 that the resulting gut microbial composition was different, and diversity (at the phylum and  
32 genus level) was reduced differentially following each antibiotic treatment. Vancomycin  
33 treatment caused a significant increase in Verrucomicrobia and Proteobacteria phyla. The  
34 treatment with neomycin yielded an increase in the Bacteroidetes phylum, while the treatment  
35 with AVNM led to an increase in Proteobacteria phylum with lowest diversity of microbiome in  
36 the gut. The current results also revealed that the different antibiotics treatment caused variation  
37 in the cecal index, expression of immune genes (TNF- $\alpha$ , IL-10, IFN- $\gamma$ ) in the colon, and short-  
38 chain fatty acids (SCFA) level in the blood of mice. A strong correlation was observed for  
39 antibiotic-induced differential dysbiosis patterns of gut microbiota and the altered immune and  
40 SCFA profile of the host. The outcome of the present study could be clinically important.

41

42 **Keywords:** Gut Microbiota; Vancomycin; AVNM; Neomycin; Cecal Index; immune response

43 Introduction:

44

## 45 **Introduction**

46 The mammalian gastrointestinal tract is inhabited by a hundred trillions of highly diverse and  
47 complex microbes (1, 2). It was well established that the abundance and diversity of these large  
48 numbers of gut microbiota play an important role in regulating the immune response of the host  
49 (3, 4). To understand the role of specific gut microbes in the host, perturbation is the most  
50 effective way. Antibiotics are widely used as the most potent perturbing agent of gut microbiota  
51 (5–7). Each antibiotic altered the abundance of some specific groups of gut microbes (8).

52 Gut microbes produce metabolites like acetate, propionate, and butyrate that belong to the group  
53 of SCFAs by metabolizing various dietary fibers in the host (9). SCFAs could suppress the  
54 lipopolysaccharide (LPS) and pro-inflammatory cytokines like  $\text{TNF}\alpha$ , IL-6, and might increase  
55 the production of anti-inflammatory cytokines, IL-10 (10, 11). During the dysbiosis of gut  
56 microbiota, the increase in the Proteobacteria group of bacteria may cause an increase in the  
57 blood endotoxin level through their LPS. LPS could enhance the production of various pro-  
58 inflammatory cytokines by activating different Toll-Like Receptors (TLR4) of the gut epithelial  
59 cells (12–16). It was observed that in the colon tissue, butyrate, an important SCFA, caused  
60 inhibition of the LPS induced activation of NF- $\kappa$ B (17–19). Dysbiosis of gut microbiota can be  
61 introduced by antibiotic treatment.

62 Dysbiosis, due to antibiotic treatment, could reduce the diversity and may change the  
63 composition of the gut microbiota to lead to a pathogenesis like inflammatory bowel disease  
64 (IBD) (20). A significant increase in certain opportunistic pathogens, resistant bacteria like  
65 *Clostridium difficile*, and a decrease in beneficial butyrate-producing bacteria were observed in  
66 IBD patients compared to healthy individuals (21). The samples from fecal material of IBD

67 patients and long term antibiotic using individuals contained very less amount of SCFAs that  
68 could lead to a higher range of inflammation in the host (5, 9, 22). The restoration of gut  
69 microbiota following cessation of long-term antibiotic therapy was a time taking incomplete  
70 process (23). The correlation between the antibiotic-induced alterations of specific groups of  
71 microbes with the immune and metabolic response of the host is still not clear in the literature.  
72 Therefore, treatment with single and different combinations of select antibiotics can give us ideas  
73 about the extent of perturbation of specific group of gut bacteria and their effects on the host  
74 immune and metabolic response. Recently, we reported that treatment with vancomycin in  
75 C57BL/6 and BALB/c mice could induce dysbiosis till day 4 following treatment but continued  
76 treatment with the antibiotic confers physiological benefit by increasing *A. muciniphila* of  
77 verrucomicrobia phylum (24, 25).

78 In the current study, we compared the efficiency of perturbation of mouse gut microbiota either  
79 by vancomycin or neomycin or a cocktail known as AVNM containing ampicillin, vancomycin,  
80 neomycin, and metronidazole. Vancomycin is a broad-spectrum antibiotic to treat MRSA or  
81 drug-resistant *clostridium difficile* induced colitis (26, 27). Neomycin is an aminoglycosidic  
82 antibiotic that arrests the growth of intestinal bacteria (28). Neomycin is an antibiotic that is very  
83 effective against gram negative bacteria of proteobacteria phylum. By killing bacteria in the gut,  
84 it keeps the ammonia level low to prevent hepatic encephalopathy. It works well against  
85 streptomycin-resistance bacteria. While neomycin cannot be given intra-venous for its renal  
86 toxicity but vancomycin is given intra-venous (29–32). AVNM, the mixture of four different  
87 antibiotics, is well established as a gut microbiota depleting agent in mice (33, 34). The role of  
88 gnotobiotic or germ-free mice models are well documented and important model system in

89 microbiome study, but because of the non-availability or inaccessibility of this model to a wide  
90 variety of scientific community, the AVNM treated mouse model serves as a good alternative.

91 Because of the different structures and functions of the antibiotics used, the treatment with each  
92 type of antibiotic caused a different kind of gut microbial modulation. Moreover, the alteration of  
93 gut microbes due to different antibiotics treatment caused the differential immune and metabolic  
94 response in the host. Expression of various pro- and anti-inflammatory immune genes and the  
95 production of specific SCFAs were strongly correlated with the abundance of specific phyla of  
96 gut microbes. The cecal size of mice also got differentially affected following treatment with  
97 different antibiotics.

## 98 **Results**

### 99 **Antibiotic treatment alters the abundance and diversity of gut microbiota**

100 Earlier reports showed the differential effects of treatment with several antibiotics causing  
101 dysbiosis of gut microbiota (5). A comparative analysis of select antibiotics to understand the  
102 changes in the composition of gut microbiota is warranted to correlate with innate mucosal  
103 immunity and systemic metabolites. The current results revealed that the gut microbiota of  
104 untreated C57BL/6 mice majorly contained Firmicutes and Bacteroidetes phyla with a very low  
105 percentage of Proteobacteria phylum (Fig 1A). Following treatment with vancomycin for seven  
106 consecutive days caused an increase in Verrucomicrobia (by 71%) and Proteobacteria (by 20%)  
107 with a concomitant decrease in Firmicutes and Bacteroidetes phyla (Table 1). On the contrary,  
108 treatment with neomycin for seven days caused a significant increase in Bacteroidetes (by 72%)  
109 and a decrease in Firmicutes like major phylum (by 23%) (Table 1). Treatment with AVNM, in  
110 accordance, caused a significant increase in Proteobacteria (by 80%) and a decrease in major

111 phyla like Firmicutes and Bacteroidetes (Fig 1A). Genus level analysis further validated the  
112 phylum level observation.

113 Genus level data showed that vancomycin treatment caused mostly an increase in the  
114 Akkermansia genus of Verrucomicrobia phylum (Fig 1B). While neomycin treatment caused an  
115 increase in the Bacteroides genus of Bacteroidetes phylum. However, AVNM treatment showed  
116 mostly elevation of Escherichia-Shigella genera of Proteobacteria phylum in the gut (Fig 1B).

117 Other members of the phylum or genus shown in the figures are for depicting the overall idea of  
118 composition and qualitative diversity of the gut microbiota. A detailed analysis of diversity is  
119 described below.

#### 120 **Alpha diversity of gut microbiota decreased following treatment with antibiotics**

121 Measurement of diversity is one of the important parameters to understand the extent of  
122 modulation of gut microbiota during antibiotic treatment (3, 35). In the current study, the  
123 Shannon diversity index at the phylum level showed a decrease in the diversity of gut microbiota  
124 in all three groups of antibiotics treated mice compared to the control group of mice.  
125 Vancomycin and neomycin treatment caused a similar extent of reduction in the diversity of gut  
126 microbiota. However, among the three antibiotic-treated groups, AVNM treatment caused a  
127 maximal reduction in gut microbial diversity (Fig 2A). The genus-level analysis of the data  
128 further validated the phylum level observations (Fig 2A).

#### 129 **Alteration in the cecal index and bodyweight of mice during treatment with antibiotics**

130 Alteration in the cecal size is usually a good indication of the variation of bacterial abundance in  
131 the cecum of mice (36). In this study, the cecal index of the antibiotic-treated mice varied

132 significantly compared to the control group of mice (Fig 2B). It increased dramatically following  
133 vancomycin and AVNM treatment. AVNM treated group had the highest weight of cecal content  
134 among all groups of mice. However, the neomycin treated group of mice showed no changes in  
135 the cecal weight compared to the control group of mice.

136 We have measured the bodyweight of control and antibiotic treated mice from day zero to day  
137 seven of the experiment but could not find any significant difference between starting (day zero)  
138 and ending points (day seven) of the experiment (Table 2). Fluid consumption (ml/day) of  
139 AVNM treated mice also did not change significantly between day zero and day seven of  
140 treatment (Table 3).

#### 141 **The inflammatory response in the colon changed following antibiotics mediated microbiota** 142 **perturbation**

143 Gut microbiota composition and diversity regulated the expression of various Immune genes in  
144 the gut (37). Different immune genes were either up- or down-regulated depending on the  
145 antibiotic treatment groups.

146 Variation in the expression of select immune genes in the colon of mice following treatment with  
147 antibiotics was determined by the qRT-PCR (Fig 3). Vancomycin treated group of mice showed  
148 an increase in IL-10 gene expression in the colon, but no significant changes were observed in  
149 the expression of TNF- $\alpha$  and IFN- $\gamma$  genes. While neomycin treated group of mice showed  
150 increased in both IL-10 and IFN- $\gamma$  expression in the colon. AVNM treatment caused an increase  
151 in TNF- $\alpha$  gene expression in the colon but no significant changes were found in the expression  
152 of IL-10 and IFN- $\gamma$  genes (Fig 4).

153 Validation of qRT-PCR results at the protein level was done by ELISA by measuring the  
154 expression of TNF-  $\alpha$ , IFN- $\gamma$ , and IL-10 genes in the samples of colon tissue (Fig 4) and serum  
155 of the host (Fig 5). ELISA results revealed that the expression of TNF- $\alpha$  was the highest in the  
156 colon (Fig 4) and serum (Fig 5) of AVNM treated mice whereas the abundance of IL-10 was  
157 more in both neomycin and vancomycin treated mice (Figs 4 and 5). IFN- $\gamma$  concentration was the  
158 highest in the serum sample of neomycin treated mice (Fig 5). The ELISA data for immune  
159 genes validated the qRT-PCR results.

### 160 **Variation in SCFA abundance following treatment with antibiotics**

161 Antibiotic treatment can drastically alter the abundance of Short-chain fatty acids (SCFAs).  
162 SCFAs are important regulators of host immune processes(9). Butyrate is mainly produced by  
163 the Firmicutes phylum while acetate and propionate are mainly produced by the Bacteroidetes  
164 phylum (9). Some earlier reports showed that *Akkeremansia muciniphila* also produced acetate  
165 and propionate in the gut (11).

166 We measured the concentrations of SCFAs in the host serum using NMR based metabolomics  
167 study. Results revealed that neomycin treatment caused the highest increase in propionate and  
168 acetate level with a significant decrease in butyrate level compared to control mice (Fig 6).  
169 Vancomycin treated mice showed a decrease in acetate and butyrate level compared to control  
170 mice while no significant changes were found in the propionate level. However, AVNM treated  
171 mice showed the most significant decrease in all three SCFAs, such as acetate, propionate, and  
172 butyrate compared to control and the other two antibiotics treated groups of mice (Fig 6).

173 We also measured the abundance of acetate in the serum of both antibiotic-treated and control  
174 groups of mice by using an acetate colorimetric assay kit (EOAC-100, San Francisco, USA). The  
175 results showed that the concentration of acetate through the colorimetric detection kit method for



176 different groups of mice, like control ( $51.2 \pm 4 \mu\text{m}$ ), vancomycin ( $42 \pm 6 \mu\text{m}$ ), neomycin ( $60 \pm 6.3$   
177  $\mu\text{m}$ ), and AVNM ( $20 \pm 1.4 \mu\text{m}$ ) showed nearly similar trends with NMR data.

## 178 **Discussion**

179 The dysbiosis pattern of gut microbiota varied significantly among the different groups of  
180 antibiotic-treated mice. Treatment, with either individual or cocktail of antibiotics, yielded a  
181 significant yet differential in the diversity of gut microbiota. We noticed a significant increase of  
182 a particular single but distinct phylum following each type of antibiotic treatment. For example,  
183 Vancomycin treatment caused a significant increase in Verrucomicrobia phylum. The treatment  
184 with neomycin yielded an increase in the Bacteroidetes phylum, while the treatment with AVNM  
185 led to an increase in Proteobacteria phylum with lowest diversity of microbiome in the gut when  
186 compared to the other two antibiotics treatment conditions.

187 AVNM treatment was found to be the most effective one to reduce the diversity of gut  
188 microbiota, therefore this cocktail was taken as one of the standard gut microbial depletion  
189 agents (38–41). Contrary to the literature (34, 42), the current study showed that AVNM  
190 treatment caused extensive depletion of gut microbiota but not completely or not to the extent to  
191 make a pseudo-gnotobiotic mice. Antibiotic treatment also promotes outgrowth of resistant  
192 bacteria that make it different from germ-free mice which are free of all microorganisms (33,  
193 43). In this study, we found that AVNM treatment caused a significant increase in the abundance  
194 of Proteobacteria phylum which replaced the other major phyla of gut microbes like Firmicutes  
195 and Bacteroidetes.

196 A strong correlation was found between the altered abundance of the specific gut microbes and  
197 the expressions of various immune genes in the colon of mice. Increased Akkermansia,

198 Bacteroidetes, Escherichia-Shigella like genera, and decreased Clostridia like genus following  
199 antibiotics treatment caused significant modulation in the expression of various immune genes in  
200 the colon. Altered levels of Firmicutes and Bacteroidetes in the gut also differentially regulated  
201 the serum SCFA concentration in each antibiotic-treated group. Following vancomycin  
202 treatment, an increased abundance of Akkermansia and Lactobacillus genera caused the  
203 increased expression of the anti-inflammatory IL-10 gene in the colon of mice. Whereas no  
204 significant changes were found in the expression of pro-inflammatory genes like TNF- $\alpha$  and  
205 IFN- $\gamma$ . Previous studies showed that the increased abundance of *Akkermansia muciniphila*  
206 induced elevated expression of anti-inflammatory cytokine genes in the gut (24, 25, 44). *A.*  
207 *muciniphilla* produces SCFA like acetate and propionate (9). In this study, the serum of  
208 vancomycin treated mice showed comparatively lower concentration of butyrate than propionate  
209 and acetate which could be a result of decreased Firmicutes (specifically *intestinimonas*) and  
210 increased *A.muciniphila* bacteria in the gut post vancomycin treatment (24, 25).

211 Following neomycin treatment, a significant increase in the Bacteroides genus of Bacteroidetes  
212 phylum caused an increase in the expression of both IFN- $\gamma$  and IL-10 genes. It was already  
213 reported that the increased abundance of *Bacteroides fragilis* caused alteration in the expression  
214 of various immune genes of the gut tissue (45–47). Some selected gram-negative bacteria in the  
215 gut stimulated the production of IL-10 cytokine (46). It is commonly known that bacteria from  
216 the Firmicutes phylum produce butyrate while the Bacteroidetes phylum produces acetate and  
217 propionate from dietary fibers (9). In this study, following neomycin treatment, a significant  
218 reduction of Firmicutes and elevation of Bacteroidetes phylum could be related to decreased  
219 butyrate with increased acetate and propionate concentration in the serum of mice. The Acetate  
220 in the host regulated different inflammatory responses of the host. It increased the expression of

221 the IFN- $\gamma$  gene by normalizing the IFN- $\gamma$  promoter, activating acetylation of histone and  
222 chromatin accessibility by acetyl-CoA synthetase (ACSS)-dependent manner (48–50). Acetate  
223 treatment also increased the IL10 level of the host, while it inhibited the LPS induced TNF- $\alpha$   
224 secretion in the peripheral blood mononuclear cells (PBMCs) of mice (9, 51, 52). This showed  
225 the anti-inflammatory effect of acetate supplement on the host. In the current study, neomycin  
226 treatment caused the elevated release of acetate, which can be associated with higher IFN- $\gamma$  and  
227 IL10 gene expression in the mice.

228 Following AVNM treatment, the dramatic increase in the Pathogenic Proteobacteria like *E.coli*,  
229 *Shigella*, and a decrease in the Clostridia group of bacteria caused an increase in TNF- $\alpha$  gene  
230 expression. Whereas no significant changes were found in the expression of IFN- $\gamma$  and IL-10  
231 genes. Previous reports showed that Firmicutes, specifically the Clostridium group present in the  
232 gut produced short-chain fatty acids and these SCFAs suppressed the LPS and pro-inflammatory  
233 cytokines (10, 11). Earlier reports showed that a considerable increase in the *Escherichia coli*  
234 like pathogenic Proteobacteria caused the higher expression of pro-inflammatory cytokine genes  
235 in the gut (53–55). In the current study, due to a significant reduction in major phyla like  
236 Firmicutes and Bacteroidetes, we observed a substantial decrease in all three SCFAs (acetate,  
237 propionate, and butyrate) level in the serum of AVNM treated mice compared to control and  
238 other antibiotic treated groups.

239 Bacteria of *Intestinimonas* genus (Firmicutes phylum), produce butyrate and Bacteroidetes  
240 produces propionate in the gut (56, 57). The production of these SCFAs in the gut suppresses the  
241 LPS and pro-inflammatory cytokines like TNF- $\alpha$  level and enhances the release of the anti-  
242 inflammatory cytokine like IL-10 in the colon (10, 11). In the current study, AVNM treatment  
243 caused a decrease in the concentrations of all three SCFAs which can be associated with higher

244 TNF-  $\alpha$  and lower IL-10 level in the colon of mice. In neomycin and vancomycin treated mice, a  
245 higher level of propionate and acetate caused more production of anti-inflammatory cytokine-  
246 like IL10 compared to AVNM treated mice.

247 The current study established the differential nature of gut microbial dysbiosis following  
248 treatment with either vancomycin or neomycin or AVNM in C57BL/6 male mice. The results  
249 correlated treatment of select antibiotics with gut microbial dysbiosis and metabolite and  
250 immune responses. The present study, however, did not investigate the comprehensive  
251 mechanism by which the abundance of certain groups of gut microbiota regulated the expression  
252 of different cytokines and SCFA levels of the host.

253 In conclusion, the current study showed different antibiotic-induced alteration patterns of gut  
254 microbiota and their association with various cytokines and SCFA levels of the host. Such  
255 association can be summed up as follows: Treatment with a) vancomycin enhanced  
256 verrucomicrobia phylum to enhance anti-inflammatory and insulin sensitivity (24, 25), b)  
257 neomycin increased Bacteroidetes phylum to promote anti-inflammatory response in the host and  
258 c) AVNM depleted most of the microbes with significant increase in pathogenic proteobacteria  
259 and beneficial verrucomicrobia phylum (24, 25). In a nutshell, the current observations are  
260 important in developing animal models for various infectious and metabolic disorder studies as  
261 well has the potential to translate clinically.

## 262 **Materials and methods**

263 **Animals:** All mice used in the present study were co-housed in polysulfone cage, and corncob  
264 was used as bedding material. Male C57BL/6 mice of 6-8 weeks of age were used in the present  
265 study. Food and water were provided *ad libitum*. Animals were co-housed in a pathogen-free

266 environment with a 12h light-dark cycle at temperature  $24 \pm 3^\circ$  with nearly 55% of humidity. All  
267 protocols were approved by the Institute Animal Ethics Committee constituted by CPCSEA  
268 (Reg. No.- 1643/GO/a/12/CPCSEA). All the animals were obtained from institutional Animal  
269 research and experimentation facility, School of Biological Science, NISER, Odisha, India.  
270 Animals were bred, grown, and used for the experiments in the same institutional animal house  
271 facility. For this study, the protocol number approved by NISER review committee was  
272 NISER/SBS/IAEC/AH-21. We didn't use any anesthetic agents for the current study. Mice were  
273 euthanized by cervical dislocation method.

274 **Antibiotic treatment:** C57BL/6 mice were divided into three groups: i) vancomycin ii)  
275 neomycin iii) AVNM treated group. Antibiotics were treated for seven consecutive days.  
276 Vancomycin treated group of mice were gavaged orally with vancomycin at a dose of 50 mg per  
277 kg of bodyweight, twice daily at a gap of 12h. Similarly, neomycin treated mice were also  
278 gavaged orally with neomycin at a dose of 50mg per kg of bodyweight twice daily. The dosages  
279 were selected as per previous reports and FDA guidelines (26, 28, 58, 59).

280 In AVNM treated group, AVNM cocktail (MP Biomedicals, Illkrich, France) was made by  
281 mixing four antibiotics i.e., ampicillin (1gm/lit), vancomycin (500mg/lit), neomycin (1gm/lit),  
282 and metronidazole (1gm/lit) in the drinking water. This cocktail of antibiotics was changed at a  
283 gap of every two days (at 48 h interval) and freshly prepared AVNM mixture was added in the  
284 drinking water bottle of mice. The dosage of AVNM treatment was selected as per previous  
285 reports (34, 41, 60). The AVNM mixture is a broad-spectrum antibiotic cocktail which inhibits  
286 both Gram-positive and Gram-negative bacteria of the gut. Ampicillin is one of the  $\beta$ -lactam  
287 antibiotics which acts against both Gram-positive and Gram-negative bacteria. Vancomycin is  
288 one of the glycopeptide antibiotics which mainly acts against Gram-positive bacteria of the

289 intestine. Neomycin is an aminoglycoside antibiotic that has bactericidal activity against the  
290 Gram-negative bacteria and metronidazole mainly works against anaerobes. Therefore in AVNM  
291 cocktail, Ampicillin and Neomycin mainly inhibit Gram-negative bacteria of the gut while  
292 Ampicillin and Vancomycin inhibit Gram-positive bacteria which makes AVNM as an efficient  
293 antimicrobial cocktail with high depletion ability of gut bacteria (34).

294 Bodyweights for untreated control and all antibiotic-treated mice were recorded from the zeroth  
295 day to the seventh day of the experiment.

296 **Mice treatment and sample collection:** Mice were separated into two different groups with  
297 Control (untreated) and Treatment (groups that were treated with antibiotics). On the 7<sup>th</sup> day of  
298 the experiment, time-matched control and treated mice were euthanized by cervical dislocation.  
299 Colon tissue and cecal materials were isolated from each mouse (n=5). Tissue samples, not used  
300 immediately, were stored in RNAlater for RNA analysis until further used (61–63). Blood was  
301 collected from both control and antibiotic-treated mice for metabolomic study.

302 RNA extraction: RNA was extracted from the colon tissue of mice (n=5) by using the RNeasy  
303 mini kit (Cat# 74104, Qiagen, Germany) following the manufacturer's protocol. 20-23 mg of  
304 tissue was processed using liquid nitrogen followed by homogenization in 700 µl of RLT buffer.  
305 An equal volume of 70% ethanol was added and mixed well. The solution was centrifuged at  
306 13,000 rpm for 5 minutes at room temperature. The clear solution containing lysate was passed  
307 through the RNeasy mini column (Qiagen, Germany), which leads to the binding of RNA with  
308 the column. The column was washed using 700 µl RW1 buffer and next with 500 µl of RPE  
309 buffer. RNA was eluted using 30 µl of nuclease-free water. RNA was quantified using  
310 NanoDrop 2000 (ThermoFisher Scientific, Columbus, OH, USA).

311 **cDNA preparation of the extracted RNA:** cDNA was synthesized from the previously  
312 extracted RNA of mice colon tissue by using Affinity Script One-Step RT-PCR Kit (Cat#  
313 600559, Agilent, Santa Clara, CA, USA). RNA was mixed with random 9mer primers, Taq  
314 polymerase, and NT buffer. The mixture was kept at 45 °C for 30 min for the synthesis of cDNA  
315 and temperature increased to 92 °C for deactivation of the enzyme.

316 **Real-time PCR (qRT-PCR) of the prepared cDNA:** Real-time PCR was performed in a 96-well  
317 plate, using 25 ng cDNA as a template, 1 µM of each of forward (\_F) and reverse (\_R) primers  
318 for genes mentioned in Table 4, SYBR green master mix (Cat#A6002, Promega, Madison, WI,  
319 USA), and nuclease-free water. qRT-PCR was performed in Quantstudio 7 (Thermo Fisher  
320 Scientific, Columbus, OH, USA). All values were normalized with the cycle threshold (Ct) value  
321 of GAPDH (internal control) and fold change of the desired gene was calculated with respect to  
322 the control using the protocol described before(62, 63).

323 **Serum collection:** Mice were anesthetized (n=3) and whole blood was collected by cardiac  
324 puncture. Blood was kept on ice for 30 mins and centrifuged at 1700g for 15 min at 4°C, and  
325 serum was collected for further analysis. If required, serum was stored at -80°C until further use.

### 326 **Cytokine Analysis at the protein level**

327 ELISA was performed in both serum sample and colon tissue of control and each group of  
328 antibiotics treated mice. Colon tissues were collected from each antibiotic-treated and untreated  
329 (control) group of mice following seven days of treatment. After washing the colon tissues  
330 thoroughly, lysis buffer (Tris-hydrochloric acid, sodium chloride, and Triton X-100 in distilled  
331 water) containing 1X protease inhibitor cocktail (PIC) (Cat#ML051, Himedia, India) was used to  
332 churn the tissue (61). The supernatant was collected following centrifuging the churned mixture  
333 at 20,000g for 20 minutes. ELISA (BD Biosciences, San Diego, CA, USA) was performed using

334 the manufacturer's protocol for TNF- $\alpha$  (Cat#560478), IFN- $\gamma$  (Cat#551866), and IL-10  
335 (Cat#555252) expression. Protein concentration was normalized through the Bradford assay (BD  
336 Biosciences, San Diego, CA, USA). The absorbance was taken using Multiskan Go (Thermo  
337 Fisher Scientific, Columbus, OH, USA).

338 Calculation of Cecal index: The bodyweight of each mouse was measured and recorded. The  
339 whole cecal content was collected in a microfuge tube and weighed for each mouse. The cecal  
340 index was measured by taking the ratio of cecal content to the bodyweight of each mouse  
341 (n=5)(36).

342 **Genomic DNA extraction:** Cecal sample was collected from untreated control and post-  
343 antibiotic-treated groups of mice (n=3) and gDNA was extracted using the phenol-chloroform  
344 method. 150-200 mg of cecal sample was used to homogenize using 1ml of 1X PBS and  
345 centrifuged at 6700g for 10 minutes. The precipitate was lysed by homogenizing it in 1ml of  
346 lysis buffer (containing Tris-HCl 0.1M, EDTA 20 mM, NaCl 100 mM, 4% SDS (at pH 8) and  
347 thereafter heating it at 80 °C for 45min. Lipid and protein parts were removed from the  
348 supernatant using an equal volume of the phenol-chloroform mixture. This process was repeated  
349 until the aqueous phase became colorless. DNA was precipitated overnight at -20 °C with 3  
350 volumes of absolute chilled ethanol. Finally, it was washed with 500  $\mu$ l of 70% chilled ethanol  
351 and briefly air-dried. The gDNA was dissolved in nuclease-free water and quantified by using  
352 NanoDrop 2000.

353 **16S-rRNA sequencing (V3-V4 Metagenomics):** From cecal DNA samples, V3-V4 regions of  
354 the 16S rRNA gene were amplified. For this amplification, V3F:5'-  
355 CCTACGGGNBGCASCAG-3' and V4R: 5'-GACTACNVGGGTATCTAATCC-3' primer pair  
356 was used. In the Illumina Miseq platform, amplicons were sequenced using paired-end



357 (250bpX2) with a sequencing depth of  $500823.1 \pm 117098$  reads (mean  $\pm$  SD). Base  
358 composition, quality, and GC content of the FASTQ sequence were checked. More than 90% of  
359 the sequences had Phred quality scores above 30 and GC content nearly 40-60%. Conserved  
360 regions from the paired-end reads were removed. Using the FLASH program, a consensus V3-  
361 V4 region sequence was constructed by removing unwanted sequences. Pre-processed reads  
362 from all the samples were pooled and clustered into Operational Taxonomic Units (OTUs) by  
363 using the de novo clustering method based on their sequence similarity using UCLUST program.  
364 QIIME was used for the OTU generation and taxonomic mapping(64). A representative  
365 sequence was identified for each OTU and aligned against the Greengenes core set of sequences  
366 using the PyNAST program (65, 66). The alignment of these representative sequences against  
367 reference chimeric data sets was done. The RDP classifier against the SILVA database was used  
368 for taxonomic classification to get rid of hybrid sequences.

### 369 **Sample preparation for NMR data acquisition and metabolite analysis**

370 Serum was obtained from the blood of antibiotic-treated and control groups of mice as described  
371 before. Samples were prepared for NMR analyses following the protocol described earlier (67).  
372 All NMR experiments were performed at 298K on a Bruker 9.4T (400 MHz) Avance-III  
373 Nanobay solution state NMR spectrometer equipped with a 5 mm broadband probe. Water  
374 suppression was done using excitation sculpting with gradients. Gradients having duration of 1  
375 ms and strength of 14.9 G/cm was used for excitation sculpting. Offset optimization was  
376 performed using real time 'gs' mode for each sample. Sinc shaped pulse of 2 ms was used for  
377 selective excitation of the water resonance. 64 transients were recorded for each set of  
378 experiments with a moderate 5s relaxation delay to ensure complete water saturation. Topspin  
379 2.1 was used to record and process the acquired spectra. Metabolite signals from NMR spectra

380 were identified (targeted) and quantified using Chenomx NMR Suite7.6 (ChenomxInc.,  
381 Edmonton, Canada). The spectra from the FID files were automatically phased and the baseline  
382 corrected and referenced to the DSS peak at 0 ppm through the Chenomx processor.  
383 Concentrations of metabolites were obtained through a profiler using Metaboanalyst using the  
384 methodology described elsewhere (65, 67–72). The profiler was used to assign and fit the  
385 metabolites peak from the Chenomx library and SCFAs such as acetate, butyrate, and propionate  
386 were quantified from the spectral intensities according to Chenomx guidelines.

387 Statistical Analysis: All the graphs were plotted using GraphPad Prism version 7.0. Statistical  
388 package in Prism was used for statistical analysis for the data to perform a ‘t’-test (to compare  
389 any 2 data sets) or ANOVA (to compare more than two datasets) as described in the text

### 390 **Acknowledgment**

391 Authors like to acknowledge the support of Animal House in maintaining and assisting the  
392 experiments with the animals.

### 393 **Conflict of Interest**

394 The authors declare that there is no conflict of interest.

### 395 **Funding & payment**

396 The current work (necessary resources to perform the experiment and the infra-structure for the  
397 laboratory) was supported by the parent institute National Institute of Science Education and  
398 Research. The current work was not supported through any extra-mural funding except the Ph.D.  
399 fellowship to PR by the Council of Scientific and Industrial Research (CSIR), Govt. of India.

### 400 **References**

- 401 1. Contijoch EJ, Britton GJ, Yang C, Mogno I, Li Z, Ng R, Llewellyn SR, Hira S, Johnson  
402 C, Rabinowitz KM. 2018. Gut microbiota density influences host physiology and is

- 403           shaped by host and microbial factors. *Elife* 8:277095.
- 404    2.    Maldonado RF, Sa-Correia I, Valvano MA. 2016. Lipopolysaccharide modification in  
405           Gram-negative bacteria during chronic infection. *FEMS Microbiol Rev* 40:480–493.
- 406    3.    Mosca A, Leclerc M, Hugot JP. 2016. Gut Microbiota Diversity and Human Diseases:  
407           Should We Reintroduce Key Predators in Our Ecosystem? *Front Microbiol* 7:455.
- 408    4.    Hakansson A, Molin G. 2011. Gut microbiota and inflammation. *Nutrients*. MDPI AG.
- 409    5.    Jernberg C, Löfmark S, Edlund C, Jansson JK. 2010. Long-term impacts of antibiotic  
410           exposure on the human intestinal microbiota. *Microbiology* 156:3216–3223.
- 411    6.    Lange K, Buerger M, Stallmach A, Bruns T. 2016. Effects of antibiotics on gut  
412           microbiota. *Dig Dis* 34:260–268.
- 413    7.    Dethlefsen L, Huse S, Sogin ML, Relman DA. 2008. The pervasive effects of an antibiotic  
414           on the human gut microbiota, as revealed by deep 16S rRNA sequencing. *PLoS Biol*  
415           6:e280.
- 416    8.    Sun L, Zhang X, Zhang Y, Zheng K, Xiang Q, Chen N, Chen Z, Zhang N, Zhu J, He Q.  
417           2019. Antibiotic-Induced Disruption of Gut Microbiota Alters Local Metabolomes and  
418           Immune Responses. *Front Cell Infect Microbiol* 9:99.
- 419    9.    Venegas DP, Marjorie K, Landskron G, González MJ, Quera R, Dijkstra G, Harmsen  
420           HJM, Faber KN, Héros MA. 2019. Short Chain Fatty Acids (SCFAs)-mediated gut  
421           epithelial and immune regulation and its relevance for Inflammatory Bowel Diseases.  
422           *Front Immunol* 10.

- 423 10. Vinolo MAR, Rodrigues HG, Nachbar RT, Curi R. 2011. Regulation of inflammation by  
424 short chain fatty acids. *Nutrients* 3:858–876.
- 425 11. Morrison DJ, Preston T. 2016. Formation of short chain fatty acids by the gut microbiota  
426 and their impact on human metabolism. *Gut Microbes* 7:189–200.
- 427 12. Steimle A, Autenrieth IB, Frick J-SS. 2016. Structure and function: Lipid A modifications  
428 in commensals and pathogens. *Int J Med Microbiol* 306:290–301.
- 429 13. Hawkesworth S, Moore SE, Fulford AJC, Barclay GR, Darboe AA, Mark H, Nyan OA,  
430 Prentice AM. 2013. Evidence for metabolic endotoxemia in obese and diabetic Gambian  
431 women. *Nutr Diabetes* 3:e83.
- 432 14. Boutagy NE, McMillan RP, Frisard MI, Hulver MW. 2016. Metabolic endotoxemia with  
433 obesity: Is it real and is it relevant? *Biochimie* 124:11–20.
- 434 15. Akira S, Hemmi H. 2003. Recognition of pathogen-associated molecular patterns by TLR  
435 family. *Immunol Lett* 85:85–95.
- 436 16. Rallabhandi P, Awomoyi A, Thomas KE, Phalipon A, Fujimoto Y, Fukase K, Kusumoto  
437 S, Qureshi N, Sztejn MB, Vogel SN. 2008. Differential activation of human TLR4 by  
438 *Escherichia coli* and *Shigella flexneri* 2a lipopolysaccharide: combined effects of lipid A  
439 acylation state and TLR4 polymorphisms on signaling. *J Immunol* 180:1139–1147.
- 440 17. Thangaraju M, Cresci GA, Liu K, Ananth S, Gnanaprakasam JP, Browning DD, Mellinger  
441 JD, Smith SB, Digby GJ, Lambert NA. 2009. GPR109A is a G-protein-coupled receptor  
442 for the bacterial fermentation product butyrate and functions as a tumor suppressor in  
443 colon. *Cancer Res* 69:2826–2832.

- 444 18. Segain JP, De La Blétière DR, Bourreille A, Leray V, Gervois N, Rosales C, Ferrier L,  
445 Bonnet C, Blottière HM, Galmiche JP. 2000. Butyrate inhibits inflammatory responses  
446 through NF $\kappa$ B inhibition: implications for Crohn's disease. *Gut* 47:397–403.
- 447 19. Liu T, Li J, Liu Y, Xiao N, Suo H, Xie K, Yang C, Wu C. 2012. Short-chain fatty acids  
448 suppress lipopolysaccharide-induced production of nitric oxide and proinflammatory  
449 cytokines through inhibition of NF- $\kappa$ B pathway in RAW264. 7 cells. *Inflammation*  
450 35:1676–1684.
- 451 20. Koido S, Ohkusa T, Kajiura T, Shinozaki J, Suzuki M, Saito K, Takakura K, Tsukinaga S,  
452 Odahara S, Yukawa T. 2014. Long-term alteration of intestinal microbiota in patients with  
453 ulcerative colitis by antibiotic combination therapy. *PLoS One* 9:e86702.
- 454 21. Willing BP, Dicksved J, Halfvarson J, Andersson AF, Lucio M, Zheng Z, Järnerot G,  
455 Tysk C, Jansson JK, Engstrand L. 2010. A pyrosequencing study in twins shows that  
456 gastrointestinal microbial profiles vary with inflammatory bowel disease phenotypes.  
457 *Gastroenterology* 139:1844–1854.
- 458 22. Zhang Q, Wu Y, Wang J, Wu G, Long W, Xue Z, Wang L, Zhang X, Pang X, Zhao Y.  
459 2016. Accelerated dysbiosis of gut microbiota during aggravation of DSS-induced colitis  
460 by a butyrate-producing bacterium. *Sci Rep* 6:1–11.
- 461 23. Isaac S, Scher JU, Djukovic A, Jiménez N, Littman DR, Abramson SB, Pamer EG, Ubeda  
462 C. 2016. Short-and long-term effects of oral vancomycin on the human intestinal  
463 microbiota. *J Antimicrob Chemother* 72:128–136.
- 464 24. Ray P, Pandey U, Das D, Aich P. 2021. Vancomycin-Induced Changes in Host Immunity

- 465 and Behavior: Comparative Genomic and Metagenomic Analysis in C57BL/6 and  
466 BALB/c Mice. *Dig Dis Sci*.
- 467 25. Ray P, Pandey U, Aich P. 2020. Comparative analysis of beneficial effects of vancomycin  
468 treatment on Th1- and Th2-biased mice and the role of gut microbiota. *J Appl Microbiol*  
469 *jam*.14853.
- 470 26. Erikstrup LT, Aarup M, Hagemann-Madsen R, Dagnaes-Hansen F, Kristensen B, Olsen  
471 KEP, Fuursted K. 2015. Treatment of *Clostridium difficile* infection in mice with  
472 vancomycin alone is as effective as treatment with vancomycin and metronidazole in  
473 combination. *BMJ open Gastroenterol* 2:e000038.
- 474 27. Pepin J. 2008. Vancomycin for the treatment of *Clostridium difficile* infection: for whom  
475 is this expensive bullet really magic? *Clin Infect Dis* 46:1493–1498.
- 476 28. Miglioli PA, Allerberger F, Calabrò GB, Gaion RM. 2001. Effects of daily oral  
477 administration of rifaximin and neomycin on faecal aerobic flora in rats. *Pharmacol Res*  
478 44:373–375.
- 479 29. WAKSMAN SA, LECHEVALIER HA, HARRIS DA. 1949. Neomycin; production and  
480 antibiotic properties. *J Clin Invest* 28:934–939.
- 481 30. Waksman SA, Lechevalier HA. 1949. Neomycin, a new antibiotic active against  
482 streptomycin-resistant bacteria, including tuberculosis organisms. *Science* (80- ) 109:305–  
483 307.
- 484 31. Waksman SA, Lechevalier HA. 1949. Neomycin, a new antibiotic active against  
485 streptomycin-resistant bacteria, including tuberculosis organisms. *Science* (80- ) 109:305–

486 307.

487 32. Liu C, Bayer A, Cosgrove SE, Daum RS, Fridkin SK, Gorwitz RJ, Kaplan SL, Karchmer  
488 AW, Levine DP, Murray BE, J. Rybak M, Talan DA, Chambers HF. 2011. Clinical  
489 Practice Guidelines by the Infectious Diseases Society of America for the Treatment of  
490 Methicillin-Resistant *Staphylococcus aureus* Infections in Adults and Children: Executive  
491 Summary. *Clin Infect Dis* 52:285–292.

492 33. Kennedy EA, King KY, Baldrige MT. 2018. Mouse microbiota models: comparing  
493 germ-free mice and antibiotics treatment as tools for modifying gut bacteria. *Front Physiol*  
494 9:1534.

495 34. Reikvam DH, Erofeev A, Sandvik A, Grcic V, Jahnsen FL, Gaustad P, McCoy KD,  
496 Macpherson AJ, Meza-Zepeda LA, Johansen FE. 2011. Depletion of murine intestinal  
497 microbiota: Effects on gut mucosa and epithelial gene expression. *PLoS One*.

498 35. Vrieze A, Out C, Fuentes S, Jonker L, Reuling I, Kootte RS, Van Nood E, Holleman F,  
499 Knaapen M, Romijn JA, Soeters MR, Blaak EE, Dallinga-Thie GM, Reijnders D,  
500 Ackermans MT, Serlie MJ, Knop FK, Holst JJ, Van Der Ley C, Kema IP, Zoetendal EG,  
501 De Vos WM, Hoekstra JBL, Stroes ES, Groen AK, Nieuwdorp M. 2014. Impact of oral  
502 vancomycin on gut microbiota, bile acid metabolism, and insulin sensitivity. *J Hepatol*  
503 60:824–831.

504 36. Shi Y, Kellingray L, Zhai Q, Le Gall G, Narbad A, Zhao J, Zhang H, Chen W. 2018.  
505 Structural and functional alterations in the microbial community and immunological  
506 consequences in a mouse model of antibiotic-induced dysbiosis. *Front Microbiol* 9.

- 507 37. Round JL, Mazmanian SK. 2009. The gut microbiota shapes intestinal immune responses  
508 during health and disease. *Nat Rev Immunol* 9:313.
- 509 38. Nakamura YK, Metea C, Karstens L, Asquith M, Gruner H, Moscibrocki C, Lee I,  
510 Brislawn CJ, Jansson JK, Rosenbaum JT. 2016. Gut microbial alterations associated with  
511 protection from autoimmune uveitis. *Invest Ophthalmol Vis Sci* 57:3747–3758.
- 512 39. Jena PK, Sheng L, Liu H-X, Kalanetra KM, Mirsoian A, Murphy WJ, French SW,  
513 Krishnan V V, Mills DA, Wan Y-JY. 2017. Western diet–induced dysbiosis in farnesoid  
514 X receptor knockout mice causes persistent hepatic inflammation after antibiotic  
515 treatment. *Am J Pathol* 187:1800–1813.
- 516 40. Ochoa-Repáraz J, Mielcarz DW, Ditrio LE, Burroughs AR, Foureau DM, Haque-Begum  
517 S, Kasper LH. 2009. Role of gut commensal microflora in the development of  
518 experimental autoimmune encephalomyelitis. *J Immunol* 183:6041–6050.
- 519 41. Cho Y, Abu-Ali G, Tashiro H, Kasahara DI, Brown TA, Brand JD, Mathews JA,  
520 Huttenhower C, Shore SA. 2018. The microbiome regulates pulmonary responses to  
521 ozone in mice. *Am J Respir Cell Mol Biol* 59:346–354.
- 522 42. Gancarčíková S, Popper M, Hřčková G, Maďar M, Mudroňová D, Sopková D, Nemcová  
523 R. 2017. Antibiotic-treated SPF mice as a gnotobiotic modelAntibiotic Use in Animals.  
524 IntechOpen.
- 525 43. Rakoff-Nahoum S, Paglino J, Eslami-Varzaneh F, Edberg S, Medzhitov R. 2004.  
526 Recognition of commensal microflora by toll-like receptors is required for intestinal  
527 homeostasis. *Cell* 118:229–241.



- 528 44. Lindenberg F, Krych L, Fielden J, Kot W, Frøkiær H, van Galen G, Nielsen DS, Hansen  
529 AK. 2019. Expression of immune regulatory genes correlate with the abundance of  
530 specific Clostridiales and Verrucomicrobia species in the equine ileum and cecum. *Sci*  
531 *Rep* 9:1–10.
- 532 45. Cohen-Poradosu R, McLoughlin RM, Lee JC, Kasper DL. 2011. *Bacteroides fragilis*–  
533 stimulated interleukin-10 contains expanding disease. *J Infect Dis* 204:363–371.
- 534 46. Hessle C, Andersson B, Wold AE. 2000. Gram-positive bacteria are potent inducers of  
535 monocytic interleukin-12 (IL-12) while gram-negative bacteria preferentially stimulate IL-  
536 10 production. *Infect Immun* 68:3581–3586.
- 537 47. Johansson MA, Saghafian-Hedengren S, Haileselassie Y, Roos S, Troye-Blomberg M,  
538 Nilsson C, Sverremark-Ekström E. 2012. Early-life gut bacteria associate with IL-4–, IL-  
539 10– and IFN- $\gamma$  production at two years of age. *PLoS One* 7.
- 540 48. Qiu J, Villa M, Sanin DE, Buck MD, O’Sullivan D, Ching R, Matsushita M, Grzes KM,  
541 Winkler F, Chang C-H. 2019. Acetate promotes T cell effector function during glucose  
542 restriction. *Cell Rep* 27:2063–2074.
- 543 49. Siska PJ, Rathmell JC. 2016. Metabolic signaling drives IFN- $\gamma$ . *Cell Metab* 24:651–652.
- 544 50. Brown MA, Rad PY, Halonen MJ. 2003. Method of birth alters interferon-gamma and  
545 interleukin-12 production by cord blood mononuclear cells. *Pediatr allergy Immunol*  
546 14:106–111.
- 547 51. Soliman ML, Combs CK, Rosenberger TA. 2013. Modulation of inflammatory cytokines  
548 and mitogen-activated protein kinases by acetate in primary astrocytes. *J Neuroimmune*

- 549            Pharmacol 8:287–300.
- 550    52.    Soliman ML, Puig KL, Combs CK, Rosenberger TA. 2012. Acetate reduces microglia  
551            inflammatory signaling in vitro. *J Neurochem* 123:555–567.
- 552    53.    Qi H, Gao Y, Li Y, Wei J, Su X, Zhang C, Liu Y, Zhu H, Sui L, Xiong Y. 2019. Induction  
553            of Inflammatory Macrophages in the Gut and Extra-Gut Tissues by Colitis-Mediated  
554            *Escherichia coli*. *iScience* 21:474–489.
- 555    54.    Jones-Hall YL, Nakatsu CH. 2016. The Intersection of TNF, IBD and the Microbiome.  
556            *Gut Microbes* 7:58–62.
- 557    55.    Holzheimer RG. 2014. Antibiotic Induced Endotoxin Release and Clinical Sepsis: a  
558            Review. *J Chemother.*
- 559    56.    Bui TPN, Ritari J, Boeren S, De Waard P, Plugge CM, De Vos WM. 2015. Production of  
560            butyrate from lysine and the Amadori product fructoselysine by a human gut commensal.  
561            *Nat Commun* 6:10062.
- 562    57.    Neis EPJG, Dejong CHC, Rensen SS. 2015. The role of microbial amino acid metabolism  
563            in host metabolism. *Nutrients* 7:2930–2946.
- 564    58.    Patel S, Preuss C V, Bernice F. 2019. *VancomycinStatPearls*. StatPearls Publishing.
- 565    59.    Hawk CT, Leary SL, Morris TH. 1999. *Formulary for laboratory animals*. Iowa State  
566            University Press Ames, IA.
- 567    60.    Rodrigues RR, Greer RL, Dong X, DSouza KN, Gurung M, Wu JY, Morgun A,  
568            Shulzhenko N. 2017. Antibiotic-Induced Alterations in Gut Microbiota Are Associated

- 569 with Changes in Glucose Metabolism in Healthy Mice. *Front Microbiol* 8:2306.
- 570 61. Ghosh A, Mukherjee R, Aich P, Naik AK, Chakraborty S, Mukhopadhyay S, Pandey U.  
571 2019. *Lactobacillus rhamnosus* GG reverses mortality of neonatal mice against  
572 *Salmonella* challenge. *Toxicol Res (Camb)*.
- 573 62. Pradhan B, Guha D, Naik AK, Banerjee A, Tambat S, Chawla S, Senapati S, Aich P.  
574 2018. Probiotics *L. acidophilus* and *B. clausii* Modulate Gut Microbiota in Th1-and Th2-  
575 Biased Mice to Ameliorate *Salmonella Typhimurium*-Induced Diarrhea. *Probiotics*  
576 *Antimicrob Proteins* 1–18.
- 577 63. Pradhan B, Guha D, Ray P, Das D, Aich P. 2016. Comparative Analysis of the Effects of  
578 Two Probiotic Bacterial Strains on Metabolism and Innate Immunity in the RAW 264.7  
579 Murine Macrophage Cell Line. *Probiotics Antimicrob Proteins*.
- 580 64. Caporaso JG, Kuczynski J, Stombaugh J, Bittinger K, Bushman FD, Costello EK, Fierer  
581 N, Pena AG, Goodrich JK, Gordon JI. 2010. QIIME allows analysis of high-throughput  
582 community sequencing data. *Nat Methods* 7:335.
- 583 65. DeSantis TZ, Hugenholtz P, Keller K, Brodie EL, Larsen N, Piceno YM, Phan R,  
584 Andersen GL. 2006. NAST: A multiple sequence alignment server for comparative  
585 analysis of 16S rRNA genes. *Nucleic Acids Res* 34:394–399.
- 586 66. DeSantis TZ, Hugenholtz P, Larsen N, Rojas M, Brodie EL, Keller K, Huber T, Dalevi D,  
587 Hu P, Andersen GL. 2006. Greengenes, a chimera-checked 16S rRNA gene database and  
588 workbench compatible with ARB. *Appl Environ Microbiol* 72:5069–5072.
- 589 67. Naik AK, Pandey U, Mukherjee R, Mukhopadhyay S, Chakraborty S, Ghosh A, Aich P.

- 590 2019. *Lactobacillus rhamnosus* GG reverses mortality of neonatal mice against  
591 *Salmonella* challenge. *Toxicol Res (Camb)*.
- 592 68. Xia J, Sinelnikov I V, Han B, Wishart DS. 2015. MetaboAnalyst 3.0—making  
593 metabolomics more meaningful. *Nucleic Acids Res* 43:W251–W257.
- 594 69. Xia J, Wishart DS. 2011. Web-based inference of biological patterns, functions and  
595 pathways from metabolomic data using MetaboAnalyst. *Nat Protoc* 6:743.
- 596 70. Hapfelmeier S, Stecher B, Barthel M, Kremer M, Müller AJ, Heikenwalder M, Stallmach  
597 T, Hensel M, Pfeffer K, Akira S. 2005. The *Salmonella* pathogenicity island (SPI)-2 and  
598 SPI-1 type III secretion systems allow *Salmonella* serovar typhimurium to trigger colitis  
599 via MyD88-dependent and MyD88-independent mechanisms. *J Immunol* 174:1675–1685.
- 600 71. Zhou Y, Zhi F. 2016. Lower level of bacteroides in the gut microbiota is associated with  
601 inflammatory bowel disease: a meta-analysis. *Biomed Res Int* 2016.
- 602 72. Frank DN, Amand ALS, Feldman RA, Boedeker EC, Harpaz N, Pace NR. 2007.  
603 Molecular-phylogenetic characterization of microbial community imbalances in human  
604 inflammatory bowel diseases. *Proc Natl Acad Sci* 104:13780–13785.
- 605
- 606

607 Figure Legends

608 Fig 1. Composition of gut microbiota at phylum and genus level for control and antibiotics  
609 treated mice.

610 Percent abundance of the gut microbiota composition in untreated (control) and antibiotics  
611 (vancomycin, neomycin, AVNM) treated mice following 7 days of treatment for A. phylum and  
612 B. genus level are shown. The percent abundance is calculated from the average values of at least  
613 3 replicates. To avoid clutter the standard deviation (which is within 10%) of the data is not  
614 shown.

615 Fig 2. Gut microbial diversity and cecal index profile of control and different antibiotics treated  
616 mice.

617 Shannon diversity Index for A. phylum and genus level of the cecal sample in the control and  
618 treated mice (vancomycin, neomycin, AVNM) following 7 days of treatments. B. The cecal  
619 index (ratio of the weight of the cecal content to the bodyweight) of control and antibiotic-treated  
620 mice. The statistical significance of diversity was calculated by two-way ANOVA. (‘\*\*\*\*\*’  
621 corresponds to  $P \leq 0.0001$ , ‘\*\*\*\*’ corresponds to  $P \leq 0.001$ , ‘\*\*\*’ corresponds to  $P \leq 0.01$ , ‘\*\*’  
622 corresponds to  $P \leq 0.05$  level of significance). Error bars shown are one standard deviation of the  
623 mean value and determined from the average values of three biological replicates.

624 Fig 3. Transcriptional level expression of select inflammatory genes following treatment with  
625 different antibiotics.

626 Fold change values of TNF- $\alpha$ , IFN- $\gamma$ , and IL-10 are shown at mRNA level by qRT-PCR  
627 following treatment with either vancomycin (VAN), or neomycin (NEO), or AVNM for 7 days.  
628 Fold change values were calculated with respect to the untreated control expression. Control fold

629 change value was normalized to 1. Statistical significance of the difference was calculated by  
630 two-way ANOVA (‘\*\*\*\*\*’ corresponds to  $P \leq 0.0001$ , ‘\*\*\*\*’ corresponds to  $P \leq 0.001$ , ‘\*\*\*’  
631 corresponds to  $P \leq 0.01$ , ‘\*’ corresponds to  $P \leq 0.05$  level of significance). Error bars shown are  
632 one standard deviation of the mean value and determined from the average values of four  
633 biological replicates.

634 Fig 4. Protein level expression of select inflammatory genes in the mice gut following treatment  
635 with different antibiotics.

636 Protein level validation for TNF- $\alpha$ , IFN- $\gamma$ , and IL-10 abundance in the colon tissue. Statistical  
637 significance of the difference was calculated by two-way ANOVA (‘\*\*\*\*\*’ corresponds to  $P \leq$   
638  $0.0001$ , ‘\*\*\*\*’ corresponds to  $P \leq 0.001$ , ‘\*\*\*’ corresponds to  $P \leq 0.01$ , ‘\*’ corresponds to  $P \leq 0.05$   
639 level of significance). Error bars shown are one standard deviation of the mean value and  
640 determined from the average values of four biological replicates.

641 Fig 5. Protein level expression of select inflammatory genes in the mice serum following  
642 treatment with different antibiotics.

643 Expression abundance of TNF- $\alpha$ , IFN- $\gamma$ , and IL-10 in the serum of mice are shown by ELISA.  
644 Statistical significance of the difference was calculated by two-way ANOVA (‘\*\*\*\*\*’  
645 corresponds to  $P \leq 0.0001$ , ‘\*\*\*\*’ corresponds to  $P \leq 0.001$ , ‘\*\*\*’ corresponds to  $P \leq 0.01$ , ‘\*’  
646 corresponds to  $P \leq 0.05$  level of significance). Error bars shown are one standard deviation of the  
647 mean value and determined from the average values of four biological replicates.

648 Fig 6. The concentration of three key short-chain fatty acids in the serum of control and different  
649 antibiotics treated mice.

650 The concentrations of major short-chain fatty acids are shown for A. acetate, B. butyrate, and C.  
651 propionate in the serum of untreated control (con), and in the mice following 7-days of treatment  
652 with vancomycin (VAN), or neomycin (NEO), or AVNM from <sup>1</sup>H-NMR studies. Statistical  
653 significance of the comparison was calculated by two-way ANOVA (‘\*\*\*’ corresponds to  $P \leq$   
654 0.001, ‘\*\*’ corresponds to  $P \leq 0.01$ , ‘\*’ corresponds to  $P \leq 0.05$  level of significance). Error bars  
655 shown are one standard deviation of the mean value and determined from the average values of  
656 three biological replicates.

657  
658 **Table 1:** Percent abundance of major phyla of gut microbes in the untreated control and different  
659 antibiotics treated mice.

---

% Abundance

---

|            | Firmicutes | Bacteroidetes | Proteobacteria | Verrucomicrobia |
|------------|------------|---------------|----------------|-----------------|
| Control    | 52(±5)     | 38(±4)        | 1.8(±0.3)      | 1.2(±0.4)       |
| Vancomycin | 9(±2)      | NIL           | 20(±4)         | 71(±6)          |
| Neomycin   | 23(±4)     | 72(±5)        | 1(±0.5)        | NIL             |
| AVNM       | NIL        | 2(±0.9)       | 80(±4)         | 18(±3)          |

---

Major groups of bacterial phyla present in the cecal content of mice are determined by metagenomic analysis (16s rRNA) at different conditions (vancomycin, neomycin, AVNM treated groups along with the time-matched control) of C57BL/6 mice. Means of percent abundance of various phyla with their respective standard deviations (±SD) are shown.

---

660

661

662 **Table 2:** Body weight of mice during antibiotic treatment.

|   | Control    | Vancomycin | Neomycin   | AVNM       |
|---|------------|------------|------------|------------|
| 0 | 26.43±0.3  | 25.36±0.38 | 27.4±0.9   | 26.77±0.55 |
| 1 | 26.4±0.36  | 25.17±0.28 | 27.28±0.75 | 26.2±0.46  |
| 2 | 26.36±0.32 | 25±0.62    | 26.81±0.16 | 25.8±0.75  |
| 3 | 26.5±0.4   | 24.85±0.58 | 27.1±0.75  | 25±0.3     |
| 4 | 26.58±0.23 | 24.7±0.5   | 27.26±0.54 | 25.9±0.37  |
| 5 | 26.37±0.29 | 25.13±0.35 | 27.2±0.25  | 26.34±0.43 |
| 6 | 26.42±0.18 | 25.41±0.39 | 27.5±0.3   | 26.61±0.58 |
| 7 | 26.51±0.25 | 26±0.7     | 28±0.5     | 26.58±0.67 |

663 Body weight of control and antibiotic-treated mice (Vancomycin, Neomycin, AVNM) from day  
 664 zero to day seven were shown. Means of body weight (g) of mice on different days with their  
 665 respective standard deviations (±SD) were represented.

666

667 **Table 3:** Daily Fluid consumption (ml/day) of mice during AVNM treatment

| Days | Control   | AVNM      | 668 |
|------|-----------|-----------|-----|
| 0    | 5.5±0.45  | 5.8±0.5   | 669 |
| 1    | 5.7±0.35  | 5.21±0.25 | 670 |
| 2    | 5.36±0.47 | 4.8±0.45  |     |
| 3    | 5.81±0.24 | 4.64±0.58 | 671 |
| 4    | 5.6±0.36  | 5±0.36    |     |
| 5    | 5.5±0.55  | 5.46±0.29 | 672 |
| 6    | 5.8±0.4   | 5.74±0.4  |     |
| 7    | 5.9±0.65  | 5.3±0.5   | 673 |

674 Daily fluid consumption kinetics for control and AVNM-treated mice from day zero to day seven  
 675 were shown. Means of fluid consumption (ml/day) of mice with their respective standard  
 676 deviations (±SD) were represented.



677

678 **Table 4:** Sequences of forward (\_F) and reverse (\_R) primers for PCR studies to confirm the  
679 expression of various genes used in this study.

680

| Gene-specific for              | Sequence of the primer used       |
|--------------------------------|-----------------------------------|
| <i>TNF-<math>\alpha</math></i> | F:5'-CCACGTCGTAGCAAACCACCAAAG-3'  |
|                                | R:5'- TGCCCGGACTCCGCAAAGTCTAAG-3' |
| <i>IL-10</i>                   | F:5'-AGGCAGTGGAGCAGGTGAAGAGTG-3'  |
|                                | R:5'-GCTCTCAAGTGTGGCCAGCCTTAG-3'  |
| <i>IFN-<math>\gamma</math></i> | F:5'-TCAAGTGGCATAGATGTGGAAGAA     |
|                                | R:5'-TGGCTTGCAGGATTTTCATG-3'      |

681

682

A.

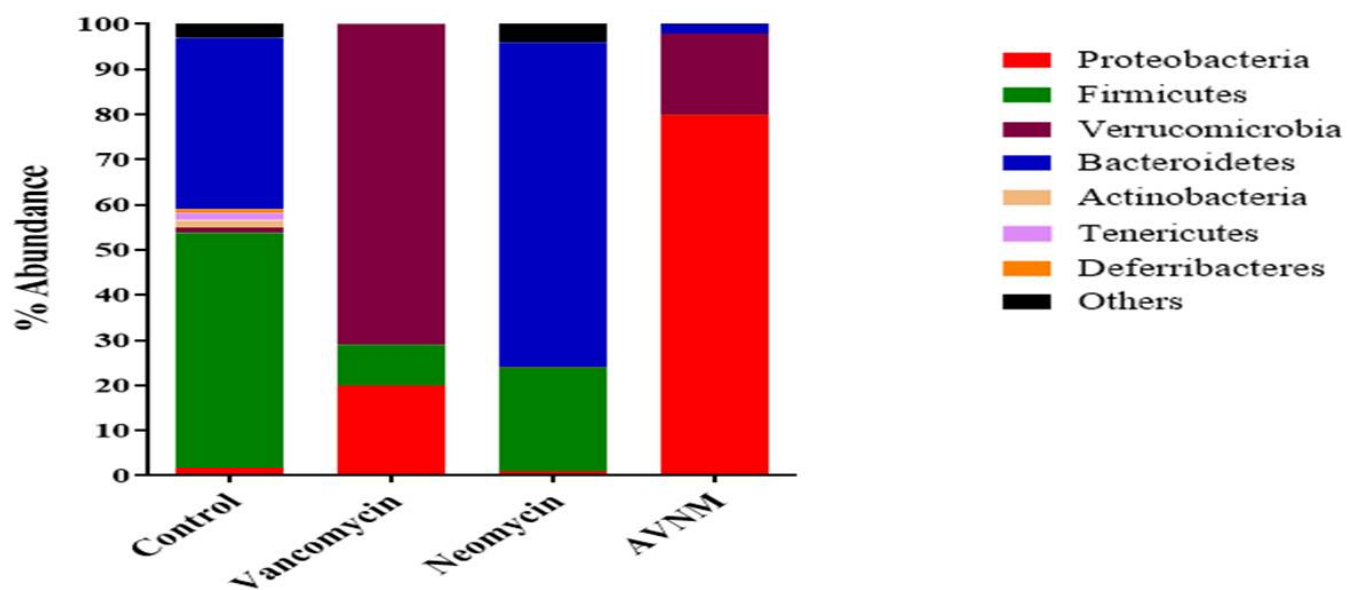

B.

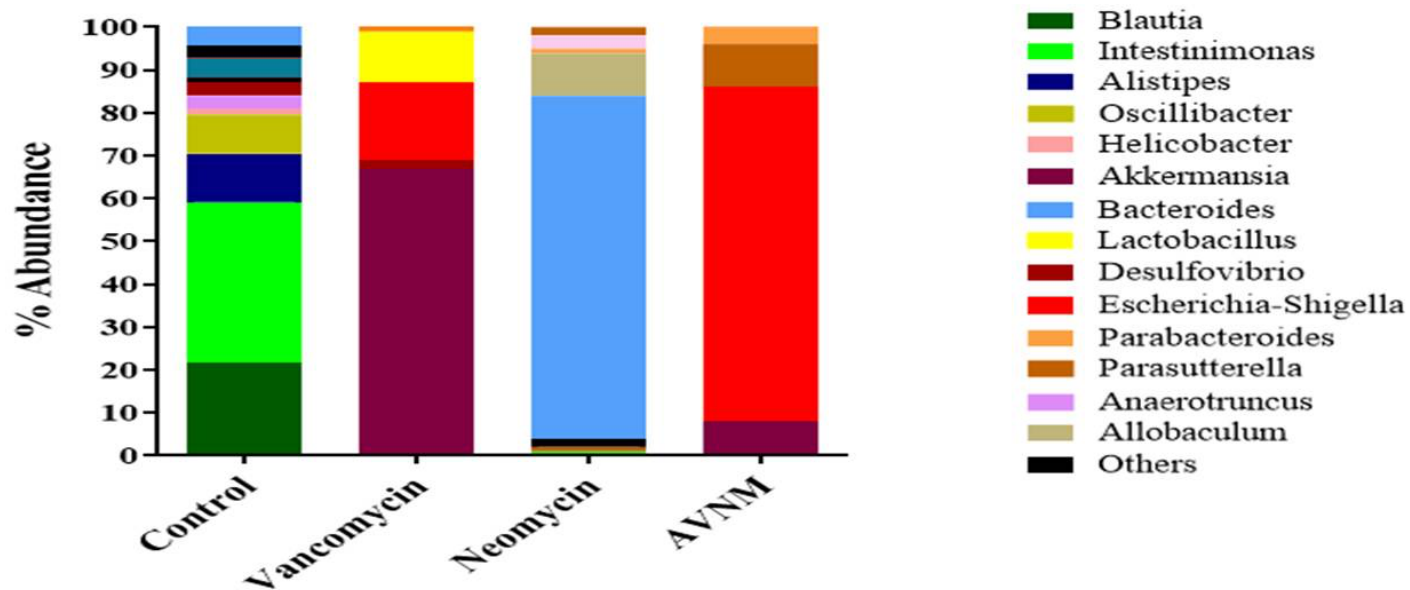

**A**

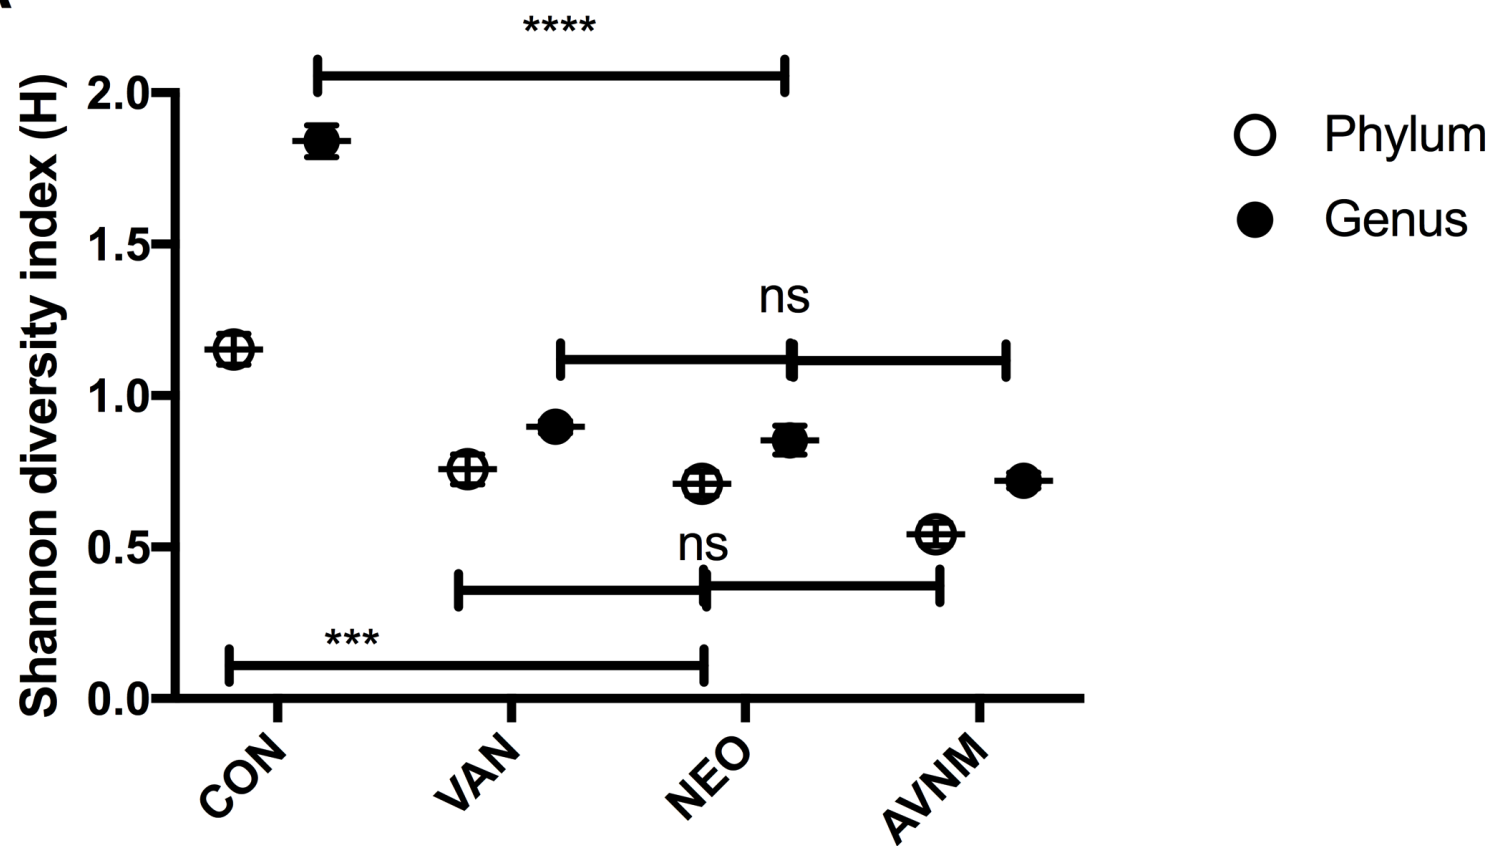

**B**

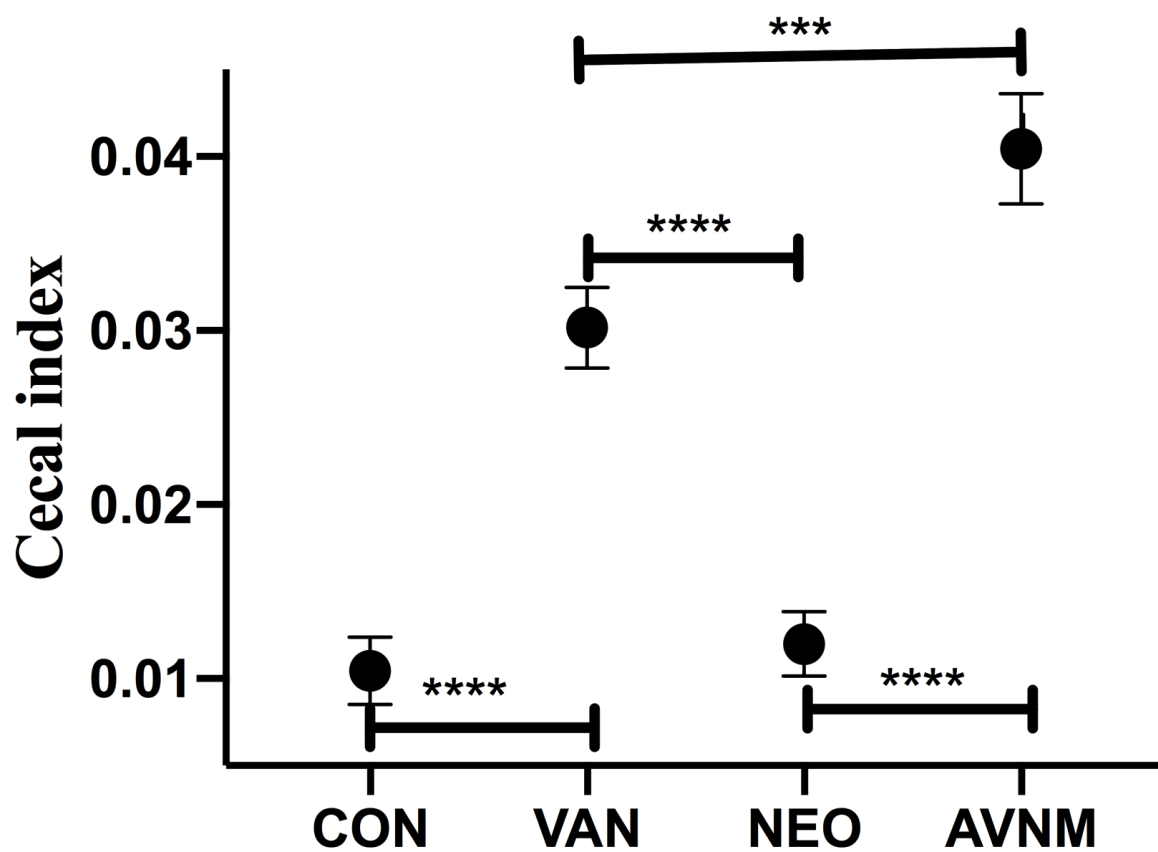

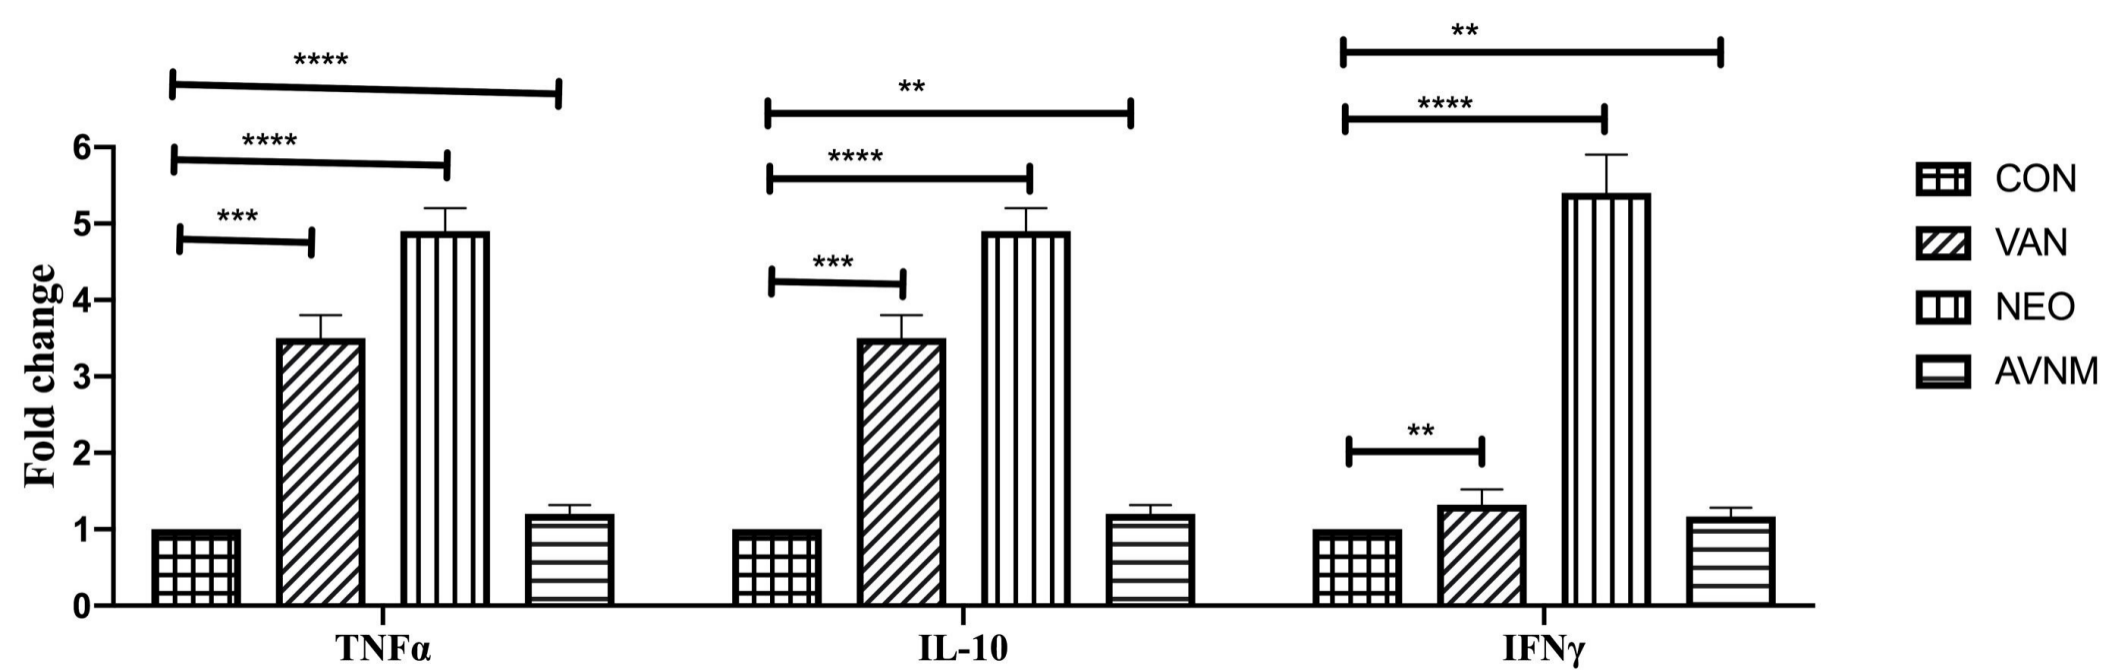

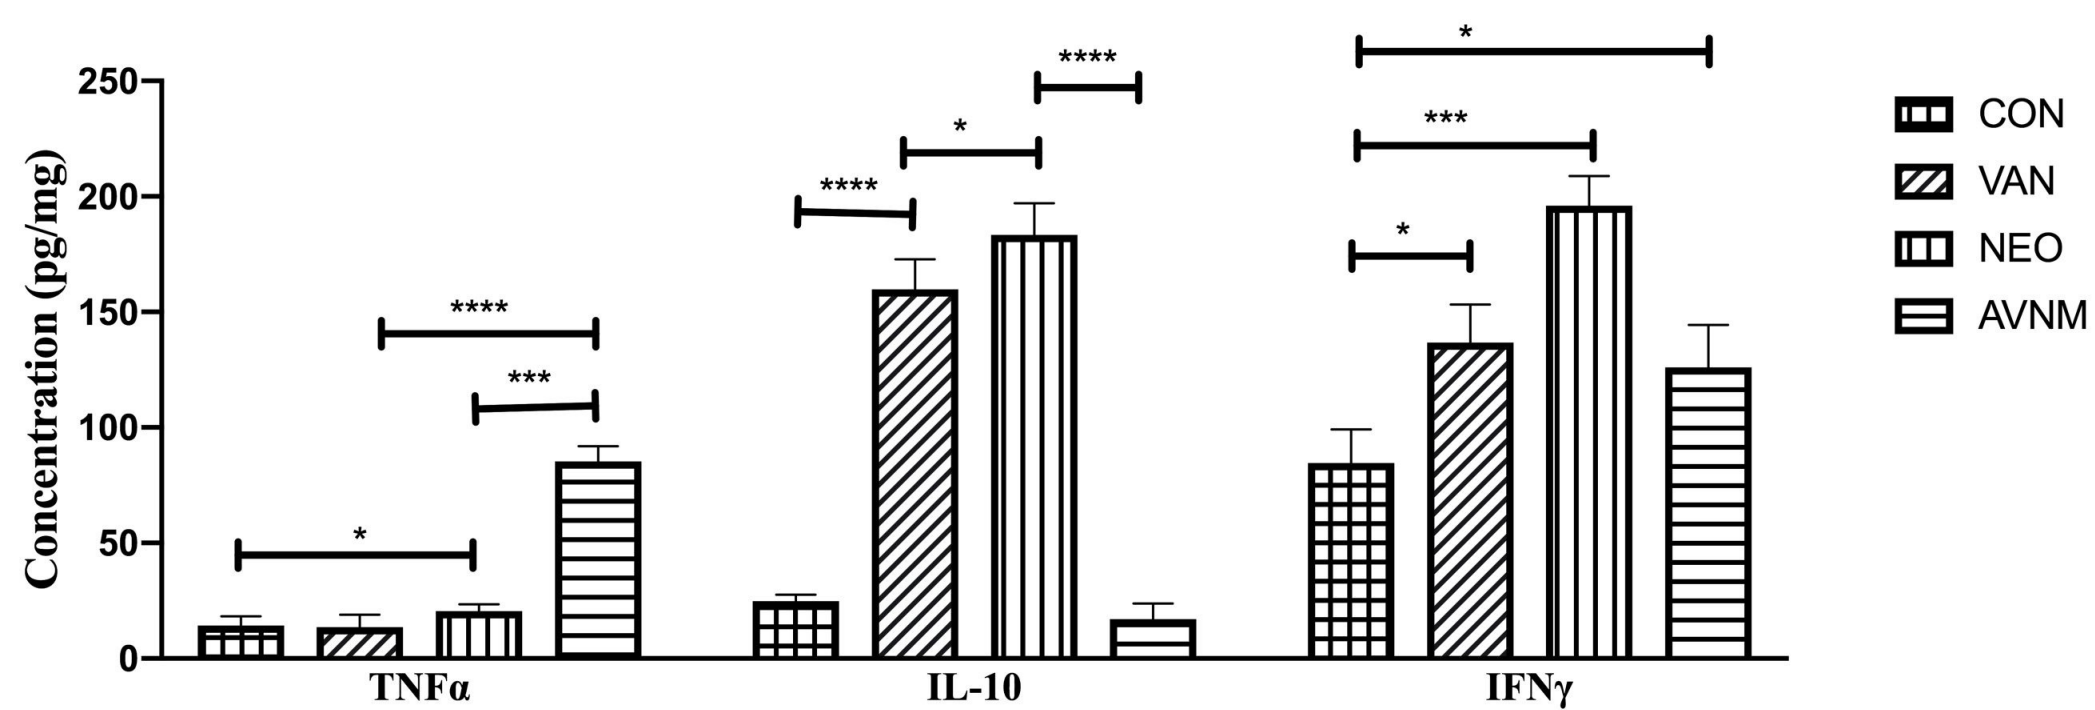

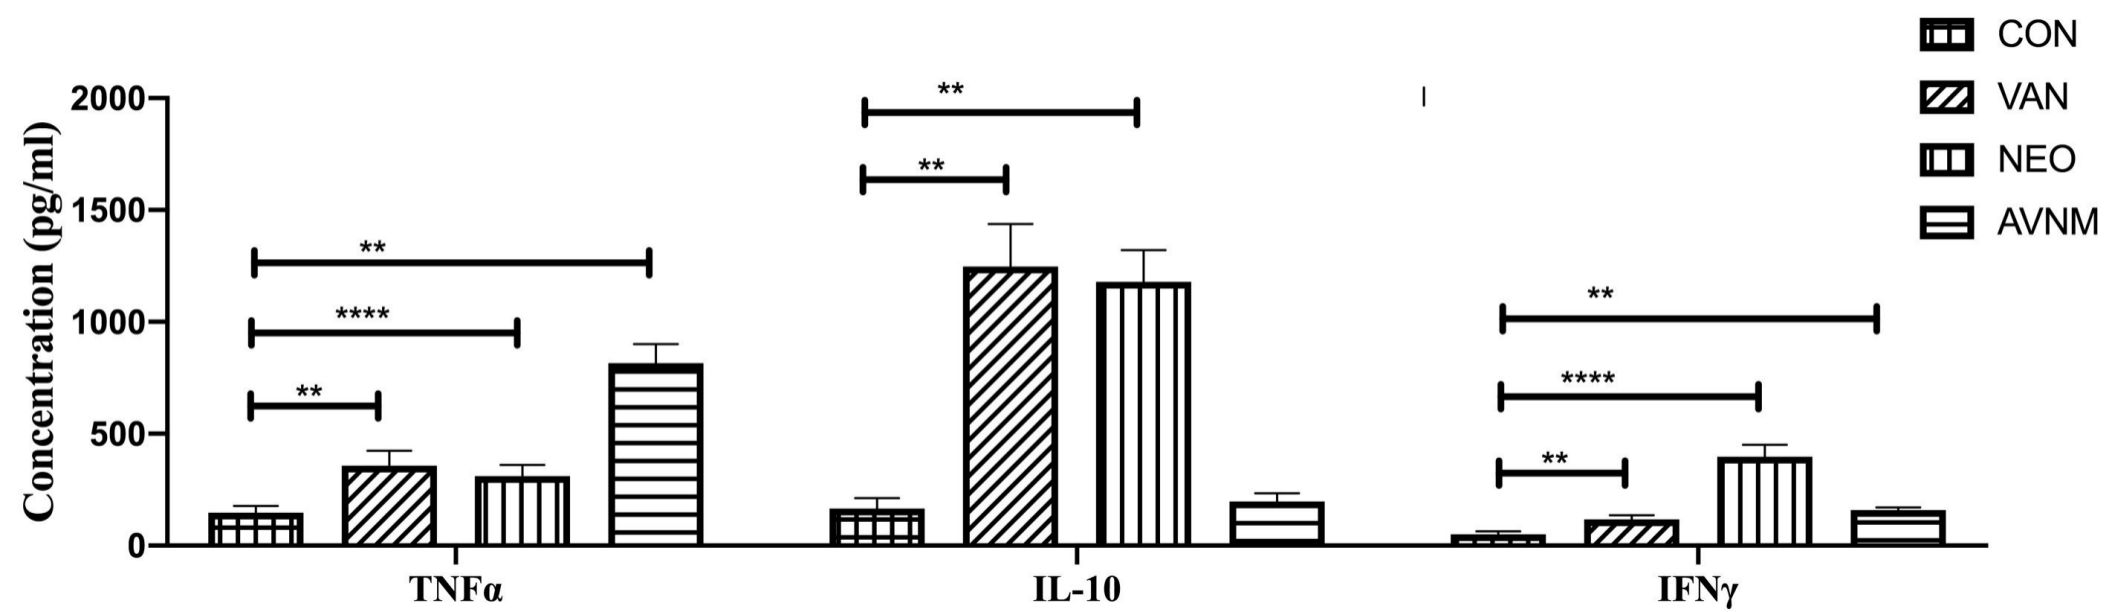

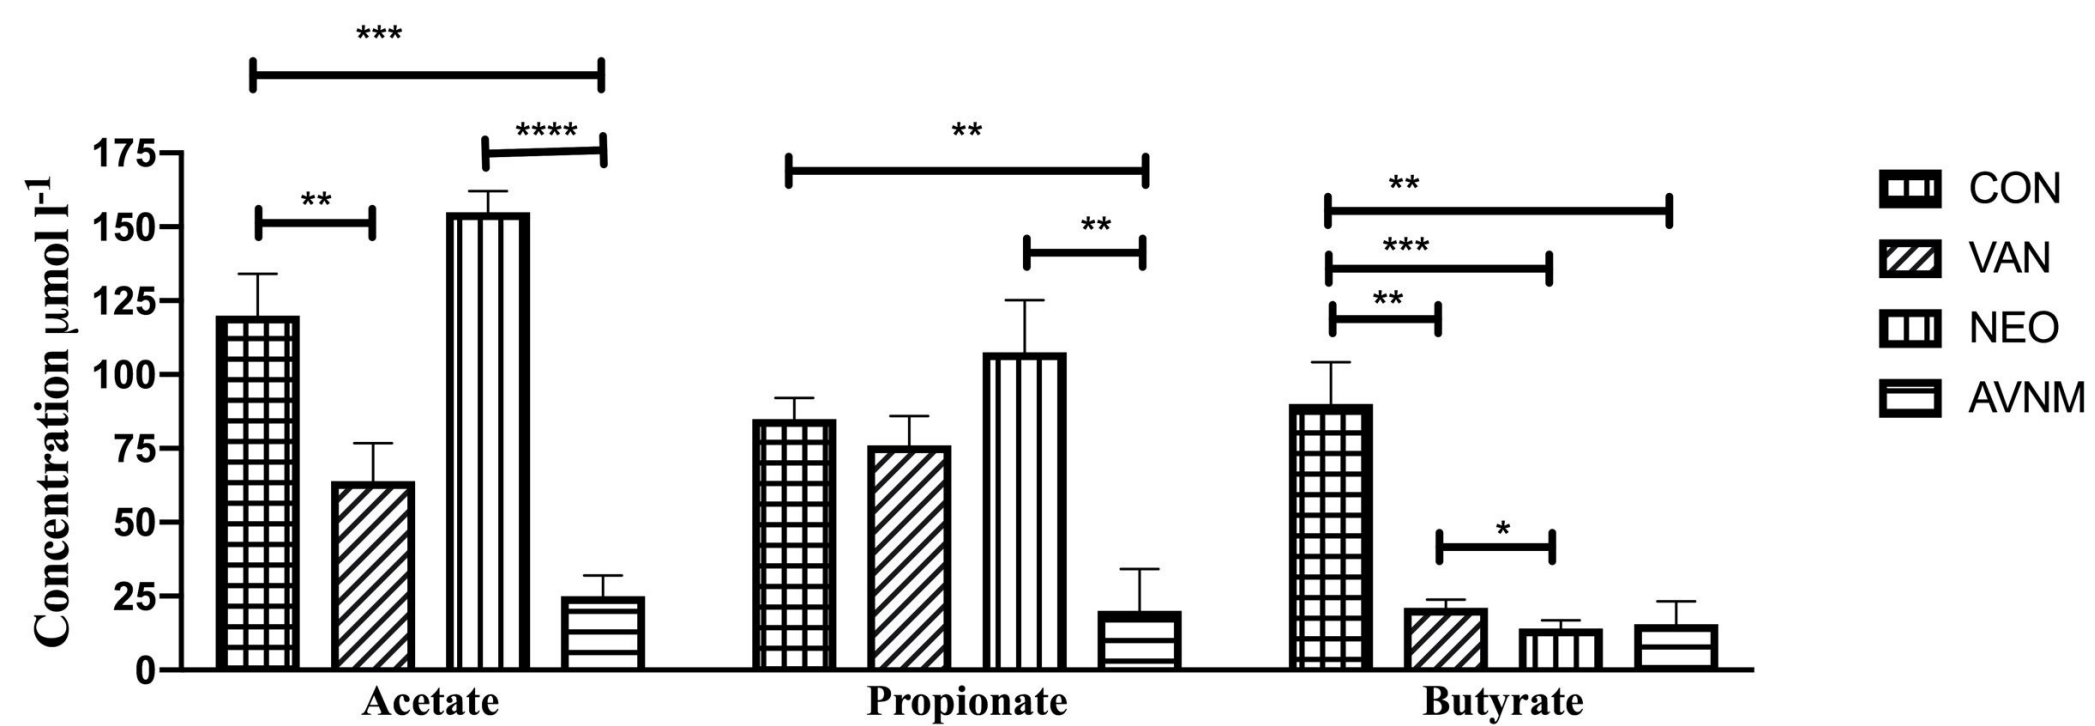

Source: https://biorxiv.org/content/10.1101/2021.02.08.430372v1.full.pdf
